# Supplementary material for: Flaxseed cyclolinopeptide-mediated regulation of α-linolenic acid metabolism alleviates high-fat diet-induced vascular inflammation
Source: Royal Society of Chemistry journal article supplement (doi:10.1039/d5fo02406d), 2025-12-23
Supplement: d5fo02406d1.pdf [file d5fo02406d1.pdf]

## Supplement materials

**Table 1.** Primer sequences for RT-qPCR.

| Gene                 | Forward primer          | Reverse primer            |
|----------------------|-------------------------|---------------------------|
| Mouse IL-6           | TCCTACCCCAACCTCCAATGCTC | TTTGGAGGTCTTGGTCCTTAGCC   |
| Mouse IL-8           | TCGAGACCATTCTACTGCAACAG | CATTGCCGGTGGAAATTCCTT     |
| Mouse ICAM           | AGGTGTGATATCCGGTAGAT    | CCTTCTAAGTGGTTTTTGAACA    |
| Mouse IL-1 $\beta$   | TGTGATGTTCCCATTAGAC     | TGTGATGTTCCCATTAGAC       |
| Mouse TNF- $\alpha$  | CCCAGGAGAAAGTCAGCCTCCT  | TCATACCAGGGCTTGAGCTCA     |
| Mouse $\beta$ -actin | ACACCCGCCACCAGTTCGC     | TCTGGGCCTCGTCACCCACAI     |
| Mouse GAPDH          | ACCCTTAAGAGGGATGCTGC    | CCCAATACGGCCAAATCCGT      |
| Human IL-6           | ATGAGGAGACTTGCCTGGTG    | GTGAGGAACAAGCCAGAGCT      |
| Human IL-8           | GAAGTTTTTGAAGAGGGCTGAGA | TGCTTGAAGTTTCACTGGCATC    |
| Human ICAM           | ATGGCAACGACTCCTTCTCG    | ATGGCAACGACTCCTTCTCG      |
| Human IL-1 $\beta$   | TCTTCATTGCTCAAGTGTCTG   | TGCCACTGTAATAAGCCATC      |
| Human TNF- $\alpha$  | AGCCCATGTTGTAGCAAACC    | ATGAGGTACAGGCCCTCTGA      |
| Human $\beta$ -actin | CCTGACTGACTACCTCATGAAG  | GACGTAGCACAGCTTCTCCTTA    |
| Human GAPDH          | GGGAAGGTGAAGGTCGGAGT    | GGGGTCATT GATGGC AACA     |
| Human 5-LOX          | CGGCACTGACGACTACATCT    | TATGAATCCACCGCGCCAC       |
| Human 12-LOX         | GAAGAGTGCCCTGGCTGAGAAG  | TTCTCCAGTTGAGCCTGAAGC     |
| Human 15-LOX         | ATTCCCCACCTGCGATACAC    | CCAGTGCTCATTATCTGGTCG     |
| Human CYP2C9         | TGCCTTTCTCAGCAGGAAAAC   | AAAGAGAGCTGCAGGGACTG      |
| Human CYPJ2          | TCGGACTCTCCTACTGGGC     | GTTCCCATATTTCTTCACAAACAGC |
| Human CYP2C18        | CCCTGGACATGAACAGTGCT    | TCCTGGACTTTAGCTGTGACC     |
| Human CYP2C19        | GCCTTTCTCAGCAGGAAAAC    | AGACCATCTGTGCTTCTTCAG     |

## Figure captions

**Figure S1. Body weight gain and average daily food intake in long-term high-fat diet intervention.** (A) Body weight gain and (B) average daily food intake per cage in C57BL/6J mice fed a high-fat diet for 12 weeks under different treatment regimens. Data are presented as mean  $\pm$  SEM ( $n = 10$  for body weight;  $n = 2$  cages per group for food intake). <sup>a-c</sup> Means with different letters differ significantly at  $P < 0.05$ .

**Figure S2. Effect of combined CLB-enriched orbitides and ALA intervention on NF- $\kappa$ B activation in vascular tissue of HFD-fed mice.** (A) Representative immunohistochemical images of NF- $\kappa$ B in aortic sections. (B) Quantitative analysis of NF- $\kappa$ B immunoreactivity. Data are expressed as mean  $\pm$  SEM ( $n = 3$ ); <sup>a, b</sup> Means with different letters differ significantly at  $P < 0.05$ .

**Figure S3. Dose-dependent effects of CLB on ALA-metabolizing enzyme expression in HUVECs.** (A-G) mRNA levels of 5-LOX, 12-LOX, 15-LOX, CYP2C9, CYP2C18, CYP2C19, and CYP2J2 in HUVECs treated with ALA and varying CLB concentrations. Data expressed as mean  $\pm$  SEM ( $n=3-4$ ); <sup>a, b</sup> Means with different letters differ significantly at  $P < 0.05$ .

**Figure S4. Individual effects of ALA or CLB on anti-vascular inflammation.** (A) Protein level of IL-6 in cell culture supernatant from HUVECs treated with ALA, as determined by ELISA. (B) Protein level of IL-6 in cell culture supernatant from HUVECs treated with CLB, as determined by ELISA. Data expressed as mean  $\pm$  SEM ( $n=4$ ); <sup>a-c</sup> Means with different letters differ significantly at  $P < 0.05$ .

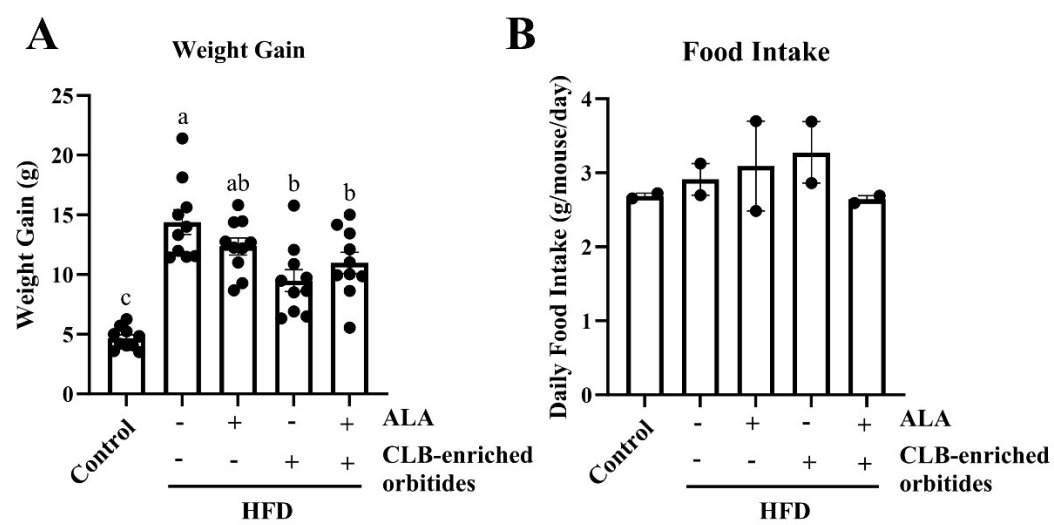

Figure S1

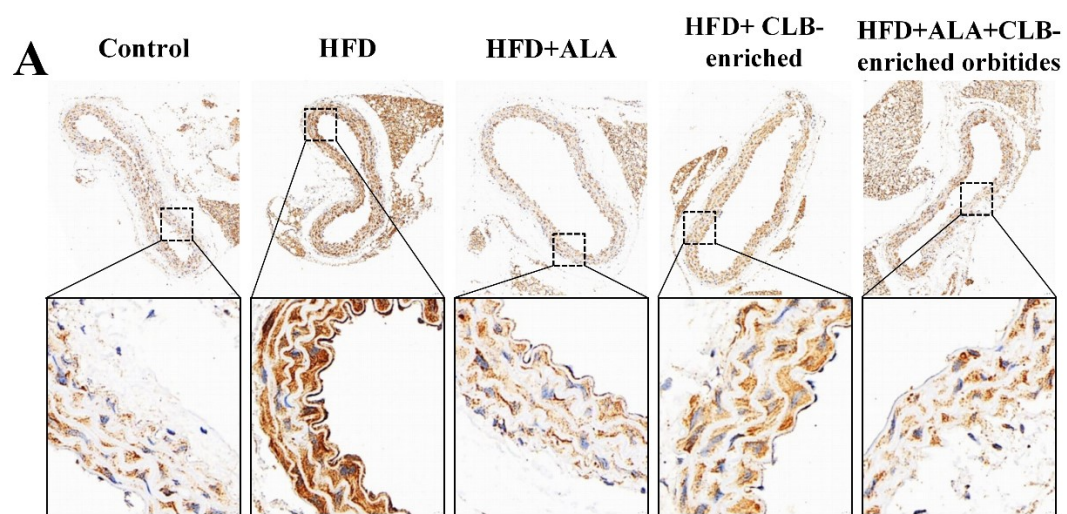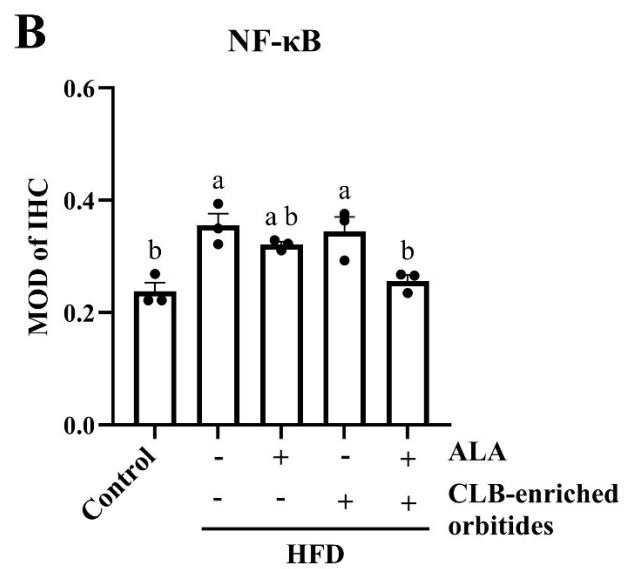

**Figure S2**

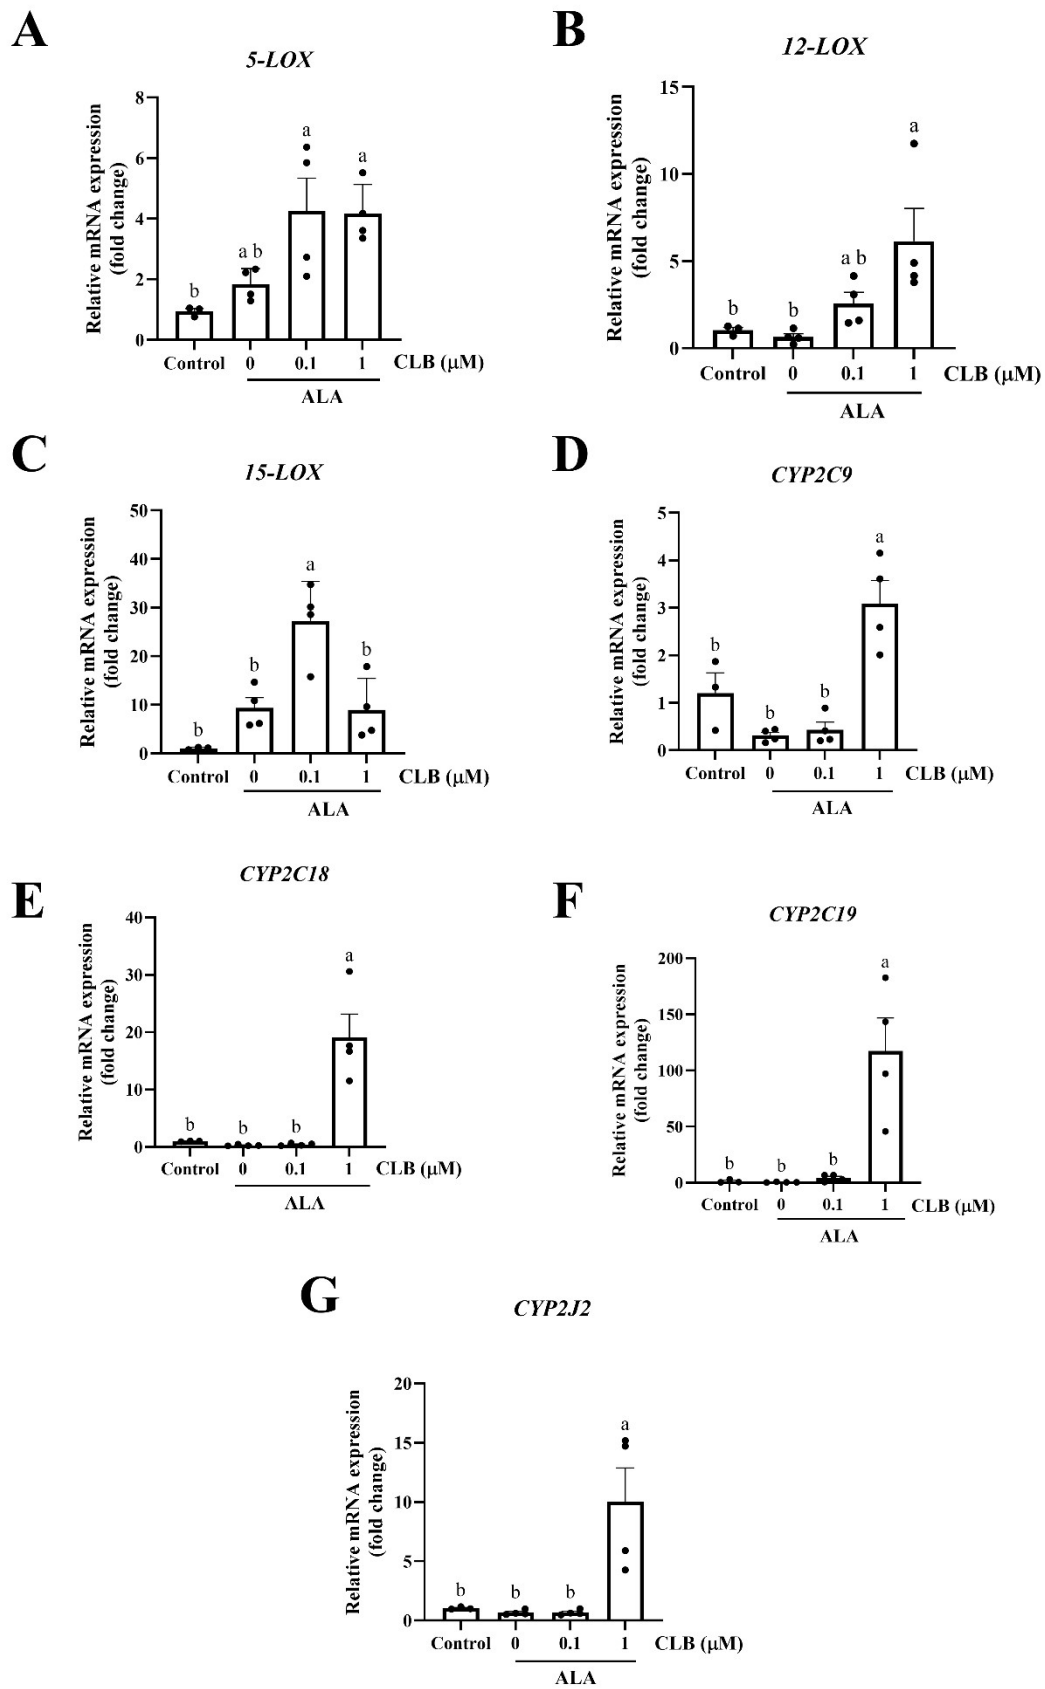

Figure S3

**A**

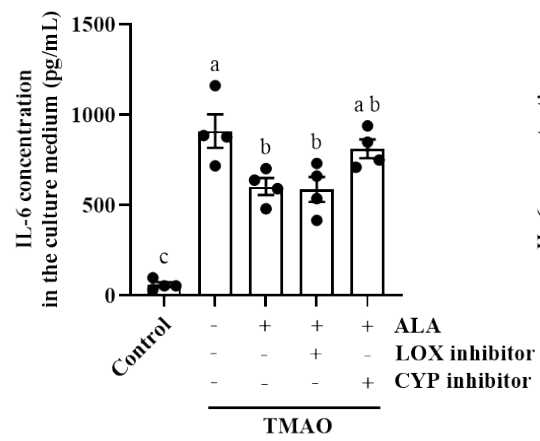

**B**

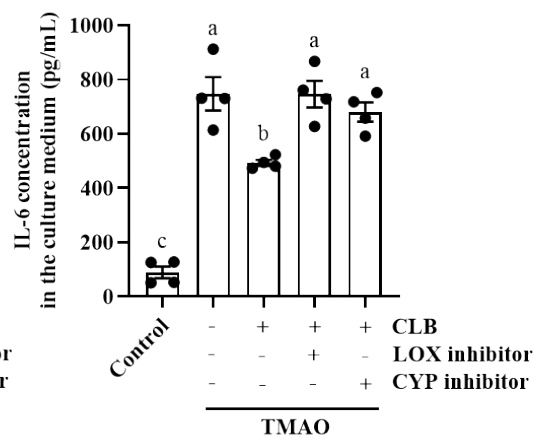

**Fi**

figure S4
